# Supplementary material
Source: PubMed Central journal article supplement (PMC3116412)
Supplement: 1100723108_pnas.201100723SI.pdf [file 1100723108_pnas.201100723SI.pdf]

# Supporting Information

Lacan et al. 10.1073/pnas.1100723108

## SI Materials and Methods

**Ancient DNA Procedures.** Drastic precautions were taken to avoid contaminations by modern DNA templates (1): pre-PCR and post-PCR procedures were carried out in two separate laboratories located on two separate floors. Pre-PCR procedures were performed in a dedicated laboratory under laminar flux. Workbenches, surfaces, and all equipment were systematically wiped with bleach, rinsed with ultrapure water, and irradiated for at least 2 h with UV light before each manipulation. Laboratory access was limited to authorized personnel only who always wore gloves, overshoes, laboratory coats, and face masks. Pipettes, plastic ware, and aerosol-resistant tips were sterile and used exclusively for ancient DNA work. DNA from people handling the anthropological material (members of the museum and laboratory staff) was also analyzed to rule out recent contamination. DNA extracted from sheep or goat bone fragments also retrieved in the ossuary were used as a negative control to detect potential contamination that could have occurred during excavation.

**Statistical Analyses.** To study putative genetic relationships between individuals from the ossuary, kinship was determined from autosomal STR profiles with ML-Relate software (2) and confirmed with DNA•VIEW Software (3), with which the LR was calculated assuming a prior probability of 0.5.

Human specimens from necropoles cannot be of course considered as a population in a statistical sense. Furthermore ancient DNA data could not be obtained for all the specimens buried, and Y-haplotypes were not determined for all male individuals. However, to try to characterize affinities between the ancient Treilles specimens and current European populations, we performed cross-population comparisons from HVI sequences and partial Y-chromosomal haplotypes with the ARLEQUIN 3.1

software (4). Two databases were compiled for both uniparental markers. The mtDNA database comprises 14,699 HVI haplotypes associated with their corresponding haplogroup. The NRY database comprises 49 European populations representing 10,488 Y-STR profiles. References used to compile these databases are available in Table S8. For maternal lineages, comparisons were based on HVI haplotypes, and for paternal lineages, they were based on seven STR markers (DYS19, DYS389a, DYS389b, DYS390, DYS391, DYS393, and DYS439) and on the seven male individuals for whom complete datasets were obtained (195, 575, 584, 596, 615, 616, and 636). The pattern of genetic differentiation was visualized by multidimensional scaling plot (XLstat, version 7.5.2) and by plotting on a map all  $F_{ST}$  values obtained in the comparison between the Treilles population and each population in the database, using Surfer software (version 8.0; Golden Software).

The percentage of shared lineages between Treilles and each present-day population in the databases was graphically also plotted on a map by using Surfer software (version 8.0; Golden Software).

A haplotype network was generated for NRY haplogroup G2a\* from the Treilles data and all European data via the median-joining algorithm of Network, version 4.5.1.6. To obtain the most parsimonious networks the reticulation permissivity was set to zero. Datasets were preprocessed using the star contraction option in Network, version 4.5.1.6 (5). Because of the high level of reticulation in the G2a\* sample, Y-STR loci were subdivided into two mutation rate classes based on observed STR allelic variance and weighted as follows: 2 (low) for DYS391 and DYS392 and 1 (high) for DYS389I, DYS389II, DYS19, DYS393, and DYS390 (6).

1. Keyser C, et al. (2009) Ancient DNA provides new insights into the history of south Siberian Kurgan people. *Hum Genet* 126:395–410.
2. Kalinowski S, Wagner A, Taper M (2006) ML-Relate: a computer program for maximum likelihood estimation of relatedness and relationship. *Mol Ecol Notes* 6: 576–579.
3. Brenner CH (1997) Symbolic kinship program. *Genetics* 145:535–542.

4. Excoffier L, Laval G, Schneider S (2005) Arlequin (version 3.0): An integrated software package for population genetics data analysis. *Evol Bioinform Online* 1:47–50.
5. Forster P, Torroni A, Renfrew C, Röhl A (2001) Phylogenetic star contraction applied to Asian and Papuan mtDNA evolution. *Mol Biol Evol* 18:1864–1881.
6. Tishkoff SA, et al. (2007) History of click-speaking populations of Africa inferred from mtDNA and Y chromosome genetic variation. *Mol Biol Evol* 24:2180–2195.

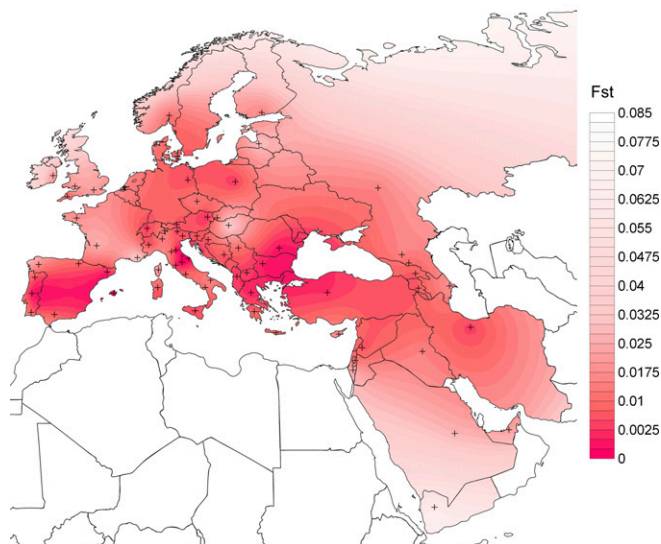

Fig. S1. Spatial distribution of the genetic matrilineal distances between Treilles samples and modern Western Eurasian populations.











**Table S3.  $F_{ST}$  values calculated between Treilles and modern Western Eurasian population data**

| Population                       | $F_{ST}$ | $P$ value        |
|----------------------------------|----------|------------------|
| <b>Middle East</b>               |          |                  |
| Iranians                         | 0.00338  | 0.25225 ± 0.0353 |
| Saudi Arabians                   | 0.02746  | 0.00000 ± 0.0000 |
| Syrians                          | 0.00588  | 0.14414 ± 0.0309 |
| Iraqis                           | 0.01515  | 0.07207 ± 0.0227 |
| Druze                            | 0.02639  | 0.00000 ± 0.0000 |
| Yemenis                          | 0.06229  | 0.00000 ± 0.0000 |
| Kurds                            | 0.01418  | 0.04505 ± 0.0203 |
| Dubai                            | 0.02235  | 0.00901 ± 0.0091 |
| Palestinians                     | 0.01156  | 0.02703 ± 0.0139 |
| Turks                            | 0.00216  | 0.27027 ± 0.0303 |
| <b>North Caucasus</b>            |          |                  |
| Russian Caucasians               | 0.0157   | 0.01802 ± 0.0121 |
| Western Russians                 | 0.01538  | 0.01802 ± 0.0121 |
| Other North Caucasus populations | 0.00965  | 0.05405 ± 0.0201 |
| <b>South Caucasus</b>            |          |                  |
| Georgians                        | 0.00712  | 0.10811 ± 0.0264 |
| Armenians                        | 0.00719  | 0.05405 ± 0.0201 |
| Azerbaijanis                     | 0.01911  | 0.01802 ± 0.0121 |
| <b>Northwestern Europe</b>       |          |                  |
| British                          | 0.02286  | 0.00000 ± 0.0000 |
| Bretagne                         | 0.01955  | 0.02703 ± 0.0139 |
| Normandie French                 | 0.02691  | 0.01802 ± 0.0121 |
| Perigord-Limousin French         | 0.02691  | 0.00000 ± 0.0000 |
| Var French                       | 0.03602  | 0.00000 ± 0.0000 |
| Welsh                            | 0.02329  | 0.00901 ± 0.0091 |
| Cornish                          | 0.00762  | 0.17117 ± 0.0286 |
| Irish                            | 0.02224  | 0.00000 ± 0.0000 |
| <b>North Central Europe</b>      |          |                  |
| Germans                          | 0.00461  | 0.13514 ± 0.0365 |
| Danish                           | 0.00769  | 0.11712 ± 0.0273 |
| Czechs                           | 0.01481  | 0.03604 ± 0.0148 |
| Polish                           | 0.00255  | 0.27027 ± 0.0470 |
| Slovakians                       | 0.01472  | 0.02703 ± 0.0194 |
| Swiss                            | 0.00295  | 0.27928 ± 0.0394 |
| Austrians                        | -0.00027 | 0.43243 ± 0.0485 |
| Latvians                         | 0.03072  | 0.00000 ± 0.0000 |
| South Tyrol Ladins               | 0.01427  | 0.03604 ± 0.0201 |
| South Tyrol Germans              | 0.00664  | 0.20721 ± 0.0430 |
| South Tyrol Italians             | 0.00259  | 0.23423 ± 0.0364 |
| <b>Scandinavia</b>               |          |                  |
| Norwegians                       | 0.01138  | 0.06306 ± 0.0237 |
| Finns                            | 0.01576  | 0.25225 ± 0.0353 |
| <b>Southeastern Europe</b>       |          |                  |
| Bulgarians                       | 0.00002  | 0.32432 ± 0.0473 |
| Hungarians                       | 0.03682  | 0.00000 ± 0.0000 |
| Bosnians                         | 0.00675  | 0.15315 ± 0.0305 |
| Serbians                         | 0.01092  | 0.06306 ± 0.0139 |
| Romanian                         | -0.00144 | 0.54054 ± 0.0664 |
| <b>Western Mediterranean</b>     |          |                  |
| North Portuguese                 | 0.00582  | 0.07207 ± 0.0227 |
| Central Portuguese               | -0.00126 | 0.53153 ± 0.0417 |
| South Portuguese                 | 0.00832  | 0.09009 ± 0.0271 |
| Galicians                        | 0.01786  | 0.02703 ± 0.0139 |
| Spanish Catalans                 | -0.00049 | 0.43243 ± 0.0466 |
| Andalusians                      | 0.00766  | 0.11712 ± 0.0237 |
| Balearic islanders               | -0.00189 | 0.52252 ± 0.0297 |
| Basques                          | 0.00884  | 0.07207 ± 0.0297 |
| <b>Central Mediterranean</b>     |          |                  |
| Northeastern Italians            | 0.00767  | 0.12613 ± 0.0242 |
| Tuscans                          | 0.00231  | 0.25225 ± 0.0445 |
| Acone Italians                   | -0.00272 | 0.57658 ± 0.0278 |
| Bologna Italians                 | -0.00108 | 0.51351 ± 0.0526 |

**Table S3 Cont.**

| Population                     | $F_{ST}$ | $P$ value        |
|--------------------------------|----------|------------------|
| Modena Italians                | 0.0145   | 0.05405 ± 0.0201 |
| Pavia Italians                 | 0.01635  | 0.09009 ± 0.0303 |
| Roma Italians                  | 0.01064  | 0.08108 ± 0.0286 |
| Turino Italians                | 0.00218  | 0.32432 ± 0.0546 |
| Terni Italians                 | -0.00498 | 0.58559 ± 0.0530 |
| Molise-Abruzzo-puglia Italians | 0.01832  | 0.02703 ± 0.0139 |
| Campania Italians              | 0.01079  | 0.13514 ± 0.0311 |
| Sicilians                      | 0.00451  | 0.17117 ± 0.0212 |
| Corsicans                      | 0.02365  | 0.00000 ± 0.0000 |
| Sardinians                     | 0.00736  | 0.15315 ± 0.0273 |
| Slovenians                     | 0.00745  | 0.16216 ± 0.0353 |
| Croatians                      | 0.00696  | 0.18919 ± 0.0212 |
| Eastern Mediterranean          |          |                  |
| Macedonians                    | 0.00487  | 0.23423 ± 0.0411 |
| Albanians                      | 0.0018   | 0.35135 ± 0.0515 |
| Cretans                        | 0.00892  | 0.13514 ± 0.0203 |
| Cypriots                       | 0.01888  | 0.02703 ± 0.0139 |
| Northern Greek                 | -0.00061 | 0.45946 ± 0.0286 |
| Central Greeks                 | 0.00043  | 0.36036 ± 0.0664 |
| Southern Greeks                | 0.00867  | 0.07207 ± 0.0182 |

$F_{ST}$  values calculated between mtDNA for Treilles (29 samples, 13 haplotypes) and modern Western Eurasian populations data (14,699 HVI haplotypes).



**Table S4. Shared mitochondrial lineages between Treilles and modern Western Eurasian populations**

| Population                       | Shared lineages, %    |                      |
|----------------------------------|-----------------------|----------------------|
|                                  | No mismatches allowed | One mismatch allowed |
| <b>Middle East</b>               |                       |                      |
| Iranians                         | 2,448                 | 4,196                |
| Saudi Arabians                   | 1,198                 | 2,994                |
| Syrians                          | 4,444                 | 10,000               |
| Iraqis                           | 1,961                 | 9,804                |
| Druze                            | 3,810                 | 7,619                |
| Yemenis                          | 2,985                 | 10,448               |
| Kurds                            | 3,448                 | 8,621                |
| Dubai                            | 1,829                 | 4,878                |
| Palestinians                     | 3,030                 | 7,071                |
| Turks                            | 1,961                 | 3,922                |
| <b>North Caucasus</b>            |                       |                      |
| Caucasian Russians               | 2,970                 | 8,911                |
| Western Russians                 | 2,778                 | 6,481                |
| Other North Caucasus populations | 1,765                 | 4,706                |
| <b>South Caucasus</b>            |                       |                      |
| Georgians                        | 2,732                 | 5,464                |
| Armenians                        | 1,613                 | 5,914                |
| Azerbaijanis                     | 5,556                 | 13,889               |
| <b>Northwestern Europe</b>       |                       |                      |
| British                          | 3,896                 | 11,688               |
| Bretagne French                  | 7.5                   | 12.5                 |
| Normandie French                 | 6.667                 | 11,111               |
| Perigord-Limousin French         | 6.667                 | 11,111               |
| Var French                       | 9.091                 | 22,727               |
| Welsh                            | 17,391                | 30,435               |
| Cornish                          | 16,667                | 29,167               |
| Irish                            | 2,564                 | 6,410                |
| <b>North-central Europe</b>      |                       |                      |
| Germans                          | 2,564                 | 4,029                |
| Danish                           | 2,857                 | 5,714                |
| Czechs                           | 3,125                 | 5,208                |
| Polish                           | 1,527                 | 3,308                |
| Slovakians                       | 5,185                 | 8,148                |
| Swiss                            | 4,651                 | 8,527                |
| Austrians                        | 7,463                 | 11,940               |
| Latvians                         | 2,941                 | 5,882                |
| South Tyrol Ladins               | 10,204                | 16,327               |
| South Tyrol Germans              | 12,000                | 16,000               |
| South Tyrol Italians             | 9,756                 | 19,512               |
| <b>Scandinavia</b>               |                       |                      |
| Norwegians                       | 3,306                 | 8,264                |
| Finns                            | 3,822                 | 7,006                |
| <b>South Eastern Europe</b>      |                       |                      |
| Bulgarians                       | 12,500                | 29,167               |
| Hungarians                       | 3,623                 | 7,246                |
| Bosnians                         | 3,497                 | 6,993                |
| Serbians                         | 4,348                 | 10,870               |
| Romanian                         | 5,000                 | 12,500               |
| <b>Western Mediterranean</b>     |                       |                      |
| Northern Portuguese              | 3.681                 | 5.521                |
| Central Portuguese               | 4.070                 | 6.395                |
| Southern Portuguese              | 5.298                 | 7.285                |
| Galicians                        | 5.882                 | 12.941               |
| Spanish Catalans                 | 7.527                 | 10,753               |
| Andalusians                      | 4,000                 | 10,000               |
| Balearic islanders               | 7,317                 | 24,390               |
| Basques                          | 8,602                 | 12,903               |
| <b>Central Mediterranean</b>     |                       |                      |
| Northeastern Italians            | 5,357                 | 9,821                |

**Table S4 Cont.**

| Population                      | Shared lineages, %    |                      |
|---------------------------------|-----------------------|----------------------|
|                                 | No mismatches allowed | One mismatch allowed |
| Tuscans                         | 3,139                 | 5,381                |
| Acone Italians                  | 9,091                 | 18,182               |
| Bologna Italians                | 11,111                | 25,000               |
| Modena Italians                 | 6,061                 | 24,242               |
| Pavia Italians                  | 11,429                | 20,000               |
| Roma Italians                   | 3,797                 | 10,127               |
| Turino Italians                 | 4,444                 | 17,778               |
| Terni Italians                  | 10,000                | 30,000               |
| Molisio-Abruzzo-puglia Italians | 4,348                 | 8,670                |
| Campania Italians               | 2,564                 | 12,821               |
| Sicilians                       | 4,587                 | 7,339                |
| Corsicans                       | 9,677                 | 19,355               |
| Sardinians                      | 3,822                 | 7,006                |
| Slovenians                      | 7,813                 | 14,063               |
| Croatians                       | 8,333                 | 16,667               |
| Eastern Mediterranean           |                       |                      |
| Macedonians                     | 4,242                 | 5,455                |
| Albanians                       | 4,225                 | 11,268               |
| Cretans                         | 5,769                 | 10,577               |
| Cypriots                        | 3,333                 | 13,333               |
| Northern Greek                  | 2,885                 | 4,327                |
| Central Greeks                  | 14,286                | 28,571               |
| Southern Greeks                 | 2,830                 | 5,660                |

Mitochondrial shared lineages between Treilles (29 samples, 13 haplotypes) and modern Western Eurasian populations (14,699 HVI haplotypes). Analyses were performed for 0 or 1 mismatch.



**Table S6.  $F_{ST}$  values calculated between Y-chromosomal data of Treilles' samples and modern Western Eurasian population data (49 populations representing 10,488 Y-STR profiles)**

| Population                   | $F_{ST}$ | $P$ value        |
|------------------------------|----------|------------------|
| <b>Middle East</b>           |          |                  |
| Iranians                     | 0.29758  | 0.00000 ± 0.0000 |
| Bakhtiari                    | 0.32066  | 0.00000 ± 0.0000 |
| Gilaki                       | 0.32231  | 0.00000 ± 0.0000 |
| Mazandarani                  | 0.32759  | 0.00000 ± 0.0000 |
| Syrians                      | 0.28712  | 0.00000 ± 0.0000 |
| Druze                        | 0.28894  | 0.00000 ± 0.0000 |
| Palestinians                 | 0.27848  | 0.00000 ± 0.0000 |
| Lebanese                     | 0.27520  | 0.00000 ± 0.0000 |
| Turks                        | 0.26764  | 0.00000 ± 0.0000 |
| <b>North Caucasus</b>        |          |                  |
| Abazians                     | 0.42472  | 0.00000 ± 0.0000 |
| Abkhazians                   | 0.44302  | 0.00000 ± 0.0000 |
| Chechenians                  | 0.42307  | 0.00000 ± 0.0000 |
| Darginians                   | 0.39692  | 0.00000 ± 0.0000 |
| Ingushians                   | 0.45255  | 0.00000 ± 0.0000 |
| Kabardinians                 | 0.31682  | 0.00000 ± 0.0000 |
| <b>South Caucasus</b>        |          |                  |
| Georgians                    | 0.30749  | 0.00000 ± 0.0000 |
| Armenians                    | 0.29941  | 0.00000 ± 0.0000 |
| Azerbaijanis                 | 0.31764  | 0.00000 ± 0.0000 |
| Lezginians                   | 0.40088  | 0.00000 ± 0.0000 |
| Ossetians                    | 0.35485  | 0.00000 ± 0.0000 |
| <b>Northwestern Europe</b>   |          |                  |
| French                       | 0.32143  | 0.00000 ± 0.0000 |
| Irish                        | 0.28895  | 0.00000 ± 0.0000 |
| Belgians                     | 0.28996  | 0.00000 ± 0.0000 |
| Dutch                        | 0.30891  | 0.00000 ± 0.0000 |
| <b>North central Europe</b>  |          |                  |
| Germans                      | 0.26655  | 0.00000 ± 0.0000 |
| Danish                       | 0.27898  | 0.00000 ± 0.0000 |
| Polish                       | 0.27598  | 0.00000 ± 0.0000 |
| <b>Scandinavia</b>           |          |                  |
| Norwegians                   | 0.26608  | 0.00000 ± 0.0000 |
| <b>Southeastern Europe</b>   |          |                  |
| Hungarian                    | 0.26761  | 0.00000 ± 0.0000 |
| Serbian                      | 0.28178  | 0.00000 ± 0.0000 |
| Serbian Romanian             |          |                  |
| Montenegrin                  | 0.27567  | 0.00000 ± 0.0000 |
| <b>Western Mediterranean</b> |          |                  |
| Portuguese                   | 0.27854  | 0.00000 ± 0.0000 |
| Spanish                      | 0.00724  | 0.00000 ± 0.0000 |
| Basque                       | 0.01392  | 0.00000 ± 0.0000 |
| <b>Central Mediterranean</b> |          |                  |
| Italians                     | 0.26635  | 0.00000 ± 0.0000 |
| <b>Eastern Mediterranean</b> |          |                  |
| Maltese                      | 0.37106  | 0.00000 ± 0.0000 |
| Cypriots                     | 0.29806  | 0.00000 ± 0.0000 |
| Northern Greeks              | 0.28846  | 0.00000 ± 0.0000 |

**Table S7. Shared Y-lineages between Treilles and modern Western Eurasian populations (49 populations representing 10,488 Y-STR profiles)**

| Population                       | Shared lineages, % |
|----------------------------------|--------------------|
| <b>Middle East</b>               |                    |
| Iranians                         | 0                  |
| Syrians                          | 0                  |
| Druze                            | 0                  |
| Palestinians                     | 0                  |
| Lebanese                         | 0.355              |
| Turks                            | 0.699              |
| <b>North Caucasus</b>            |                    |
| Other North Caucasus populations | 0                  |
| <b>South Caucasus</b>            |                    |
| Georgians                        | 0                  |
| Armenians                        | 0                  |
| Azerbaijanis                     | 0                  |
| Other South Caucasus populations | 0                  |
| <b>Northwestern Europe</b>       |                    |
| French                           | 0                  |
| Irish                            | 0                  |
| Belgians                         | 0                  |
| Dutch                            | 0                  |
| <b>North Central Europe</b>      |                    |
| Germans                          | 0.226              |
| Danish                           | 0                  |
| Polish                           | 0                  |
| <b>Scandinavia</b>               |                    |
| Norwegians                       | 0                  |
| <b>Southeastern Europe</b>       |                    |
| Hungarians                       | 0                  |
| Serbians                         | 0                  |
| Serbian Romanians                | 0                  |
| Montenegrins                     | 0                  |
| <b>Western Mediterranean</b>     |                    |
| Portuguese                       | 1.980              |
| Galician                         | 0                  |
| Catalan                          | 0                  |
| Other Spanish                    | 0.248              |
| Basque                           | 0                  |
| <b>Central Mediterranean</b>     |                    |
| Italians                         | 0.385              |
| Sicilians                        | 0                  |
| Sardinians                       | 0                  |
| <b>Eastern Mediterranean</b>     |                    |
| Maltese                          | 0                  |
| Cypriots                         | 2.062              |
| North Greeks                     | 0                  |

**Table S8. References of the populations included in the databases**

| Population (size)                               | References HVS-I | Population (size)                               | References Y-STR |
|-------------------------------------------------|------------------|-------------------------------------------------|------------------|
| <b>Middle East (<i>n</i> = 2,689)</b>           |                  | <b>Middle East (<i>n</i> = 2,482)</b>           |                  |
| Iranians                                        | 1, 2             | Iranians                                        | 3                |
| Saudi Arabians                                  | 4–6              |                                                 |                  |
| Syrians                                         | 2, 7             | Syrians                                         | 8                |
| Iraqis                                          | 9                |                                                 |                  |
| Druze                                           | 10, 11           | Druze                                           | 11               |
| Yemenis                                         | 12               |                                                 |                  |
| Kurds                                           | 2, 13            |                                                 |                  |
| Dubai                                           | 14               |                                                 |                  |
| Palestinians                                    | 2                | Palestinians                                    | 8                |
|                                                 |                  | Lebanese                                        | 15               |
| Turks                                           | 2, 16–20         | Turks                                           | 21, 22           |
| <b>North Caucasus (<i>n</i> = 594)</b>          |                  | <b>North Caucasus (<i>n</i> = 78)</b>           |                  |
| Caucasians Russians                             | 2                |                                                 |                  |
| Western Russians                                | 23               |                                                 |                  |
| Other North Caucasus populations                | 10, 19, 24, 25   | Other North Caucasus populations                | 26               |
| <b>South Caucasus (<i>n</i> = 652)</b>          |                  | <b>South Caucasus (<i>n</i> = 424)</b>          |                  |
| Georgians                                       | 13, 19, 27, 28   | Georgians                                       | 26               |
| Armenians                                       | 2, 27, 29        | Armenians                                       | 26               |
| Azerbaijanis                                    | 27               | Azerbaijanis                                    | 3, 26            |
|                                                 |                  | Other South Caucasus populations                | 26               |
| <b>Northwestern Europe (<i>n</i> = 783)</b>     |                  | <b>Northwestern Europe (<i>n</i> = 408)</b>     |                  |
| British                                         | 30               |                                                 |                  |
| French                                          | 31               | French                                          | 32               |
| Welsh                                           | 20               |                                                 |                  |
| Cornish                                         | 20               |                                                 |                  |
| Irish                                           | 20, 33           | Irish                                           | 34               |
|                                                 |                  | Belgians                                        | 35               |
|                                                 |                  | Dutch                                           | 36               |
| <b>North-Central Europe (<i>n</i> = 3,239)</b>  |                  | <b>North-Central Europe (<i>n</i> = 1,695)</b>  |                  |
| Germans                                         | 20, 23, 37–39    | Germans                                         | 36, 40           |
| Danish                                          | 2, 20            | Danish                                          | 41               |
| Czechs                                          | 42               |                                                 |                  |
| Polish                                          | 23, 43, 44       | Polish                                          | 45               |
| Slovakians                                      | 29, 46           |                                                 |                  |
| Swiss                                           | 20, 47, 48       |                                                 |                  |
| Latvians                                        | 49               |                                                 |                  |
| Austrians                                       | 50               |                                                 |                  |
| South Tyrol Ladins                              | 51, 52           |                                                 |                  |
| South Tyrol Germans                             | 51               |                                                 |                  |
| South Tyrol Italians                            | 51               |                                                 |                  |
| <b>Scandinavia (<i>n</i> = 712)</b>             |                  | <b>Scandinavia (<i>n</i> = 1,967)</b>           |                  |
| Norwegians                                      | 53               | Norwegians                                      | 54               |
| Finns                                           | 55–57            |                                                 |                  |
| <b>Southeastern Europe (<i>n</i> = 909)</b>     |                  | <b>Southeastern Europe (<i>n</i> = 1,078)</b>   |                  |
| Bulgarians                                      | 16               |                                                 |                  |
| Hungarians                                      | 58–60            | Hungarians                                      | 61               |
| Bosnians                                        | 62, 63           |                                                 |                  |
| Serbians                                        | 62               | Serbians                                        | 64               |
| Romanian                                        | 65               | Serbian Romanians                               | 66               |
|                                                 |                  | Montenegrins                                    | 64               |
| <b>Western Mediterranean (<i>n</i> = 1,625)</b> |                  | <b>Western Mediterranean (<i>n</i> = 1,442)</b> |                  |
| Portuguese                                      | 67, 68           | Portuguese                                      | 69               |
| Galicians                                       | 68, 70           | Galicians                                       | 69, 71           |
| Spanish Catalans                                | 72, 73           | Spanish Catalans                                | 69               |
| Andalusians                                     | 72, 74, 75       |                                                 |                  |
| Balearic islanders                              | 75               |                                                 |                  |
|                                                 |                  | Other Spanish                                   | 69, 71, 76, 77   |
| Basques                                         | 2, 72, 78–80     | Basques                                         | 69               |
| <b>Central Mediterranean (<i>n</i> = 2,040)</b> |                  | <b>Central Mediterranean (<i>n</i> = 562)</b>   |                  |
| Northeastern Italians                           | 52, 81–84        | Northern Italians                               | 85               |

Table S8 Cont.

| Population (size)                                                                                                              | References HVS-I | Population (size)               | References Y-STR |
|--------------------------------------------------------------------------------------------------------------------------------|------------------|---------------------------------|------------------|
| Tuscans                                                                                                                        | 75, 86, 87       |                                 |                  |
| Other Italians: Accone,<br>Bologna, Firenze,<br>Modena, Pavia,<br>Roma, Torino,<br>Terni, Molisio-<br>Abruzzo-puglia, Campania | 84, 88, 89       |                                 |                  |
|                                                                                                                                |                  | Southern Italians               | 71               |
| Sicilians                                                                                                                      | 88, 90           | Sicilians                       | 71, 91           |
| Corsicans                                                                                                                      | 92               |                                 |                  |
| Sardinians                                                                                                                     | 20, 75, 93, 94   | Sardinians                      | 95               |
| Slovenians                                                                                                                     | 63               |                                 |                  |
| Croatians                                                                                                                      | 62               |                                 |                  |
| Eastern Mediterranean (n = 1,298)                                                                                              |                  | Eastern Mediterranean (n = 404) |                  |
| Macedonians                                                                                                                    | 65, 88, 96, 97   |                                 |                  |
| Albanians                                                                                                                      | 65, 98           |                                 |                  |
| Cretans                                                                                                                        | 7, 88, 99        | Maltese                         | 8                |
| Cypriots                                                                                                                       | 100              | Cypriots                        | 8                |
| Northern Greek                                                                                                                 | 97, 100          | Northern Greeks                 | 101              |
| Central Greeks                                                                                                                 | 88, 97           |                                 |                  |
| Southern Greeks                                                                                                                | 83, 88, 97       |                                 |                  |
| Other Greeks                                                                                                                   | 65               |                                 |                  |

- Metspalu M, et al. (2004) Most of the extant mtDNA boundaries in south and southwest Asia were likely shaped during the initial settlement of Eurasia by anatomically modern humans. *BMC Genet* 5:26.
- Richards M, et al. (2000) Tracing European founder lineages in the Near Eastern mtDNA pool. *Am J Hum Genet* 67:1251–1276.
- Roewer L, Willuweit S, Stoneking M, Nasidze I (2009) A Y-STR database of Iranian and Azerbaijanian minority populations. *Forensic Sci Int Genet* 4:e53–e55.
- Abu-Amro KK, González AM, Larruga JM, Bosley TM, Cabrera VM (2007) Eurasian and African mitochondrial DNA influences in the Saudi Arabian population. *BMC Evol Biol* 7:32.
- Abu-Amro KK, Larruga JM, Cabrera VM, González AM (2008) Mitochondrial DNA structure in the Arabian Peninsula. *BMC Evol Biol* 8:45.
- Di Rienzo A, Wilson AC (1991) Branching pattern in the evolutionary tree for human mitochondrial DNA. *Proc Natl Acad Sci USA* 88:1597–1601.
- Vernes C, et al. (2001) Genetic characterization of the body attributed to the evangelist Luke. *Proc Natl Acad Sci USA* 98:13460–13463.
- Zalloua PA, et al.; Genographic Consortium Identifying genetic traces of historical expansions: Phoenician footprints in the Mediterranean. *Am J Hum Genet* 83:633–642.
- Al-Zahery N, et al. (2003) Y-chromosome and mtDNA polymorphisms in Iraq, a crossroad of the early human dispersal and of post-Neolithic migrations. *Mol Phylogenet Evol* 28:458–472.
- Macaulay V, et al. (1999) The emerging tree of West Eurasian mtDNAs: A synthesis of control-region sequences and RFLPs. *Am J Hum Genet* 64:232–249.
- Shlush LI, et al. (2008) The Druze: A population genetic refugium of the Near East. *PLoS ONE* 3:e2105.
- Kivisild T, et al. (2004) Ethiopian mitochondrial DNA heritage: tracking gene flow across and around the gate of tears. *Am J Hum Genet* 75:752–770.
- Comas D, Calafell F, Bendukidze N, Fañanás L, Bertranpetit J (2000) Georgian and kurd mtDNA sequence analysis shows a lack of correlation between languages and female genetic lineages. *Am J Phys Anthropol* 112:5–16.
- Alshamali F, Brandstätter A, Zimmermann B, Parson W (2008) Mitochondrial DNA control region variation in Dubai, United Arab Emirates. *Forensic Sci Int Genet* 2:e9–e10.
- Zalloua PA, et al.; Genographic Consortium (2008) Y-chromosomal diversity in Lebanon is structured by recent historical events. *Am J Hum Genet* 82:873–882.
- Calafell F, Underhill P, Tolun A, Angelicheva D, Kalaydjieva L (1996) From Asia to Europe: Mitochondrial DNA sequence variability in Bulgarians and Turks. *Ann Hum Genet* 60:35–49.
- Comas D, Calafell F, Mateu E, Pérez-Lezaun A, Bertranpetit J (1996) Geographic variation in human mitochondrial DNA control region sequence: the population history of Turkey and its relationship to the European populations. *Mol Biol Evol* 13:1067–1077.
- Di Benedetto G, et al. (2001) DNA diversity and population admixture in Anatolia. *Am J Phys Anthropol* 115:144–156.
- Quintana-Murci L, et al. (2004) Where west meets east: the complex mtDNA landscape of the southwest and Central Asian corridor. *Am J Hum Genet* 74:827–845.
- Richards M, et al. (1996) Paleolithic and neolithic lineages in the European mitochondrial gene pool. *Am J Hum Genet* 59:185–203.
- Alakoc YD, et al. (2010) Y-chromosome and autosomal STR diversity in four proximate settlements in Central Anatolia. *Forensic Sci Int Genet* 4:e135–e137.
- Cinnioğlu C, et al. (2004) Excavating Y-chromosome haplotype strata in Anatolia. *Hum Genet* 114:127–148.
- Malyarchuk BA, et al. (2002) Mitochondrial DNA variability in Poles and Russians. *Ann Hum Genet* 66:261–283.
- Nasidze I, et al. (2004) Mitochondrial DNA and Y-chromosome variation in the caucasus. *Ann Hum Genet* 68:205–221.
- Lebedeva IA, Seryogin YA, Poltarau AB, *Mitochondrial DNA Polymorphism in Adygeis*. Available at <http://www.ncbi.nlm.nih.gov/nuccore>; accession numbers AF285277–AF285384.
- Nasidze I, Schädlich H, Stoneking M (2003) Haplotypes from the Caucasus, Turkey and Iran for nine Y-STR loci. *Forensic Sci Int* 137:85–93.
- Nasidze I, et al. (2004) Genetic evidence concerning the origins of South and North Ossetians. *Ann Hum Genet* 68:588–599.
- Reidla M, *Mitochondrial DNA Lineages in Georgia*. Available at <http://www.ncbi.nlm.nih.gov/nuccore>; accession numbers AJ389196–AJ389375.
- Metspalu E, Kivisild T, Kaldma K, Reidla M, Villems R, *Mitochondrial DNA Lineages and the History of the Roms (Gypsies)*. Available at <http://www.ncbi.nlm.nih.gov/nuccore>; accession numbers AJ233203–AJ233348 and AJ240164–AJ240248 (Armenians and Slovaks).
- Piercy R, Sullivan KM, Benson N, Gill P (1993) The application of mitochondrial DNA typing to the study of white Caucasian genetic identification. *Int J Legal Med* 106:85–90.
- Dubut V, et al. (2004) mtDNA polymorphisms in five French groups: Importance of regional sampling. *Eur J Hum Genet* 12:293–300.
- Balaresque P, et al. (2010) A predominantly neolithic origin for European paternal lineages. *PLoS Biol*, 10.1371/journal.pbio.1000285.
- McÉvoy B, Richards M, Forster P, Bradley DG (2004) The Longue Durée of genetic ancestry: Multiple genetic marker systems and Celtic origins on the Atlantic facade of Europe. *Am J Hum Genet* 75:693–702.
- Ballard DJ, Phillips C, Thacker CR, Court DS (2006) Y chromosome STR haplotype data for an Irish population. *Forensic Sci Int* 161:64–68.
- De Maesschalck K, et al. (2005) Y-chromosomal STR haplotypes in a Belgian population sample and identification of a micro-variant with a flanking site mutation at DYS19. *Forensic Sci Int* 152:89–94.
- Rodig H, et al. (2008) Evaluation of haplotype discrimination capacity of 35 Y-chromosomal short tandem repeat loci. *Forensic Sci Int* 174:182–188.
- Brandstätter A, Klein R, Duftner N, Wiegand P, Parson W (2006) Application of a quasi-median network analysis for the visualization of character conflicts to a population sample of mitochondrial DNA control region sequences from southern Germany (Ulm). *Int J Legal Med* 120:310–314.
- Lutz S, Weisser HJ, Heizmann J, Pollak S (1998) Location and frequency of polymorphic positions in the mtDNA control region of individuals from Germany. *Int J Legal Med* 111:67–77.
- Tetzlaff S, Brandstätter A, Wegener R, Parson W, Weirich V (2007) Mitochondrial DNA population data of HVS-I and HVS-II sequences from a northeast German sample. *Forensic Sci Int* 172:218–224.
- Hohoff C, et al. (2007) Y-chromosomal microsatellite mutation rates in a population sample from northwestern Germany. *Int J Legal Med* 121:359–363.
- Hallenberg C, Nielsen K, Simonsen B, Sanchez J, Morling N (2005) Y-chromosome STR haplotypes in Danes. *Forensic Sci Int* 155:205–210.

42. Malyarchuk BA, Vanacek T, Perkova MA, Derenko MV, Sip M (2006) Mitochondrial DNA variability in the Czech population, with application to the ethnic history of Slavs. *Hum Biol* 78: 681–696.
43. Grzybowski T, et al. (2007) Complex interactions of the Eastern and Western Slavic populations with other European groups as revealed by mitochondrial DNA analysis. *Forensic Sci Int Genet* 1:141–147.
44. Malyarchuk BA, Rogozin IB, Berikov VB, Derenko MV (2002) Analysis of phylogenetically reconstructed mutational spectra in human mitochondrial DNA control region. *Hum Genet* 111:46–53.
45. Rebała K, Szczerkowska Z (2005) Polish population study on Y chromosome haplotypes defined by 18 STR loci. *Int J Legal Med* 119:303–305.
46. Malyarchuk BA, et al. (2008) Mitochondrial DNA variability in Slovaks, with application to the Roma origin. *Ann Hum Genet* 72:228–240.
47. Dimo-Simonin N, Grange F, Taroni F, Brandt-Casadevall C, Mangin P (2000) Forensic evaluation of mtDNA in a population from south west Switzerland. *Int J Legal Med* 113:89–97.
48. Pult I, et al. (1994) Mitochondrial DNA sequences from Switzerland reveal striking homogeneity of European populations. *Biol Chem Hoppe Seyler* 375:837–840.
49. Pliss L, et al. (2006) Mitochondrial DNA portrait of Latvians: towards the understanding of the genetic structure of Baltic-speaking populations. *Ann Hum Genet* 70:439–458.
50. Parson W, Parsons TJ, Scheithauer R, Holland MM (1998) Population data for 101 Austrian Caucasian mitochondrial DNA d-loop sequences: Application of mtDNA sequence analysis to a forensic case. *Int J Legal Med* 111:124–132.
51. Thomas MG, et al. (2008) New genetic evidence supports isolation and drift in the Ladin communities of the South Tyrolean Alps but not an ancient origin in the Middle East. *Eur J Hum Genet* 16:124–134.
52. Vernesi C, Fuselli S, Castri L, Bertorelle G, Barbujani G (2002) Mitochondrial diversity in linguistic isolates of the Alps: a reappraisal. *Hum Biol* 74:725–730.
53. Helgason A, et al. (2001) mtDNA and the islands of the North Atlantic: Estimating the proportions of Norse and Gaelic ancestry. *Am J Hum Genet* 68:723–737.
54. Dupuy BM, et al. (2001) Y-chromosome variation in a Norwegian population sample. *Forensic Sci Int* 117:163–173.
55. Kittles RA, et al. (1999) Autosomal, mitochondrial, and Y chromosome DNA variation in Finland: evidence for a male-specific bottleneck. *Am J Phys Anthropol* 108:381–399.
56. Lahermo P, et al. (1996) The genetic relationship between the Finns and the Finnish Saami (Lapps): Analysis of nuclear DNA and mtDNA. *Am J Hum Genet* 58:1309–1322.
57. Meiniälä M, Finniälä S, Majamaa K (2001) Evidence for mtDNA admixture between the Finns and the Saami. *Hum Hered* 52:160–170.
58. Bogácsi-Szabó E, et al. (2005) Mitochondrial DNA of ancient Cumanians: Culturally Asian steppe nomadic immigrants with substantially more western Eurasian mitochondrial DNA lineages. *Hum Biol* 77:639–662.
59. Irwin J, et al. (2007) Hungarian mtDNA population databases from Budapest and the Baranya county Roma. *Int J Legal Med* 121:377–383.
60. Tömöry G, et al. (2007) Comparison of maternal lineage and biogeographic analyses of ancient and modern Hungarian populations. *Am J Phys Anthropol* 134:354–368.
61. Völgyi A, Zalán A, Szvetnik E, Pamjav H (2009) Hungarian population data for 11 Y-STR and 49 Y-SNP markers. *Forensic Sci Int Genet* 3:e27–e28.
62. Harvey M, Gordon K, Owens K, Lee M, King MC, *MtDNA Sequences from Balkan Populations*. Available at <http://www.ncbi.nlm.nih.gov/nuccore>; accession numbers AY005666–AY005724 (Croatians), AY005729–AY005784 (Serbians), and AY005485–AY005644 (Bosnians).
63. Malyarchuk BA, et al. (2003) Mitochondrial DNA variability in Bosnians and Slovenians. *Ann Hum Genet* 67:412–425.
64. Mirabal S, et al. (2010) Human Y-chromosome short tandem repeats: A tale of acculturation and migrations as mechanisms for the diffusion of agriculture in the Balkan Peninsula. *Am J Phys Anthropol* 142:380–390.
65. Bosch E, et al. (2006) Paternal and maternal lineages in the Balkans show a homogeneous landscape over linguistic barriers, except for the isolated Aromuns. *Ann Hum Genet* 70: 459–487.
66. Regueiro M, et al. (2011) Divergent patrilineal signals in three Roma populations. *Am J Phys Anthropol* 144:80–91.
67. Pereira L, Cunha C, Amorim A (2004) Predicting sampling saturation of mtDNA haplotypes: An application to an enlarged Portuguese database. *Int J Legal Med* 118:132–136.
68. González AM, et al. (2003) Mitochondrial DNA affinities at the Atlantic fringe of Europe. *Am J Phys Anthropol* 120:391–404.
69. Adams SM, et al. (2008) The genetic legacy of religious diversity and intolerance: Paternal lineages of Christians, Jews, and Muslims in the Iberian Peninsula. *Am J Hum Genet* 83: 725–736.
70. Salas A, Comas D, Lareu MV, Bertranpetit J, Carracedo A (1998) mtDNA analysis of the Galician population: A genetic edge of European variation. *Eur J Hum Genet* 6:365–375.
71. Rodríguez V, et al. (2009) Genetic sub-structure in western Mediterranean populations revealed by 12 Y-chromosome STR loci. *Int J Legal Med* 123:137–141.
72. Côrte-Real HB, et al. (1996) Genetic diversity in the Iberian Peninsula determined from mitochondrial sequence analysis. *Ann Hum Genet* 60:331–350.
73. Crespiello M, et al. (2000) Mitochondrial DNA sequences for 118 individuals from northeastern Spain. *Int J Legal Med* 114:130–132.
74. Casas MJ, Hageberg E, Fregel R, Larruga JM, González AM (2006) Human mitochondrial DNA diversity in an archaeological site in al-Andalus: Genetic impact of migrations from North Africa in medieval Spain. *Am J Phys Anthropol* 131:539–551.
75. Falchi A, et al. (2006) Genetic history of some western Mediterranean human isolates through mtDNA HVR1 polymorphisms. *J Hum Genet* 51:9–14.
76. Gaibar M, et al. (2010) STR genetic diversity in a Mediterranean population from the south of the Iberian Peninsula. *Ann Hum Biol* 37:253–266.
77. Flores C, et al. (2003) A predominant European ancestry of paternal lineages from Canary Islanders. *Ann Hum Genet* 67:138–152.
78. Alfonso-Sánchez MA, et al. (2008) Mitochondrial DNA haplogroup diversity in Basques: A reassessment based on HVI and HVII polymorphisms. *Am J Hum Biol* 20:154–164.
79. Alzualde A, Izagirre N, Alonso S, Alonso A, de la Rúa C (2005) Temporal mitochondrial DNA variation in the Basque Country: Influence of post-neolithic events. *Ann Hum Genet* 69: 665–679.
80. Bertranpetit J, et al. (1995) Human mitochondrial DNA variation and the origin of Basques. *Ann Hum Genet* 59:63–81.
81. Guimarães S, et al. (2009) Genealogical discontinuities among Etruscan, Medieval, and contemporary Tuscans. *Mol Biol Evol* 26:2157–2166.
82. Mogentale-Profizi N, et al. (2001) Mitochondrial DNA sequence diversity in two groups of Italian Veneto speakers from Veneto. *Ann Hum Genet* 65:153–166.
83. Vernesi C, et al. (2004) The Etruscans: A population-genetic study. *Am J Hum Genet* 74:694–704.
84. Babalini C, et al. (2005) The population history of the Croatian linguistic minority of Molise (southern Italy): A maternal view. *Eur J Hum Genet* 13:902–912.
85. Turrina S, Atzei R, De Leo D (2006) Y-chromosomal STR haplotypes in a Northeast Italian population sample using 17plex loci PCR assay. *Int J Legal Med* 120:56–59.
86. Achilli A, et al. (2007) Mitochondrial DNA variation of modern Tuscans supports the near eastern origin of Etruscans. *Am J Hum Genet* 80:759–768.
87. Francaalacci P, Bertranpetit J, Calafell F, Underhill PA (1996) Sequence diversity of the control region of mitochondrial DNA in Tuscany and its implications for the peopling of Europe. *Am J Phys Anthropol* 100:443–460.
88. Forster P, et al. (2002) Continental and subcontinental distributions of mtDNA control region types. *Int J Legal Med* 116:99–108.
89. Turchi C, et al.; Ge.F.I. Group Italian mitochondrial DNA database: results of a collaborative exercise and proficiency testing. *Int J Legal Med* 122:199–204.
90. Cali F, et al. (2001) MtDNA control region and RFLP data for Sicily and France. *Int J Legal Med* 114:229–231.
91. Di Gaetano C, et al. (2009) Differential Greek and northern African migrations to Sicily are supported by genetic evidence from the Y chromosome. *Eur J Hum Genet* 17:91–99.
92. Varesi L, et al. (2000) Mitochondrial control-region sequence variation in the Corsican population, France. *Am J Hum Biol* 12:339–351.
93. Caramelli D, et al. (2007) Genetic variation in prehistoric Sardinia. *Hum Genet* 122:327–336.
94. Varesi L, Piras IS, Calo CM, Vona G, *Mitochondrial DNA Polymorphism in the HVRI Control Region in the Population of Sardinia (Gallura)*. Available at <http://www.ncbi.nlm.nih.gov/nuccore>; accession numbers DQ081414–DQ081464.
95. Ghiani ME, et al. (2009) Population data for Y-chromosome haplotypes defined by AmpFISTR Yfiler PCR amplification kit in North Sardinia (Italy). *Coll Antropol* 33:643–651.
96. Zimmermann B, et al. (2007) Mitochondrial DNA control region population data from Macedonia. *Forensic Sci Int Genet* 1:e4–e9.
97. Kouvatsi A, Karaïskou N, Apostolidis A, Kirmizidis G (2001) Mitochondrial DNA sequence variation in Greeks. *Hum Biol* 73:855–869.
98. Belledi M, et al. (2000) Maternal and paternal lineages in Albania and the genetic structure of Indo-European populations. *Eur J Hum Genet* 8:480–486.
99. Vilems R, Homo sapiens *Mitochondrial DNA D-Loop HVR1 Sequence*. Available at <http://www.ncbi.nlm.nih.gov/nuccore>; accession numbers AJ274757–AJ274942.
100. Irwin J, et al. (2008) Mitochondrial control region sequences from northern Greece and Greek Cypriots. *Int J Legal Med* 122:87–89.
101. Kovatsi L, Saunier JL, Irwin JA (2009) Population genetics of Y-chromosome STRs in a population of Northern Greeks. *Forensic Sci Int Genet* 4:e21–e22.
